# Supplementary material
Source: publisher site journal article supplement (https://www.dovepress.com/article/211569)
Supplement: Supplementary file 1 [file get_supplementary_file.php]

1 **Human plasma proteomics study in a pilot scale identifies Apo E and IL-33 as**  
2 **markers in atopic asthma**

3

#### 4 **Supplementary Material**

5 **Supplementary Figure 1: Snapshot of 1-Dimensional SDS-PAGE of depleted and**  
6 **undepleted plasma samples.** Lanes: M denotes prestained protein marker; A and B  
7 denotes plasma samples after removal of the high abundant proteins; C denotes  
8 undepleted plasma sample.

Supplementary Figure 1

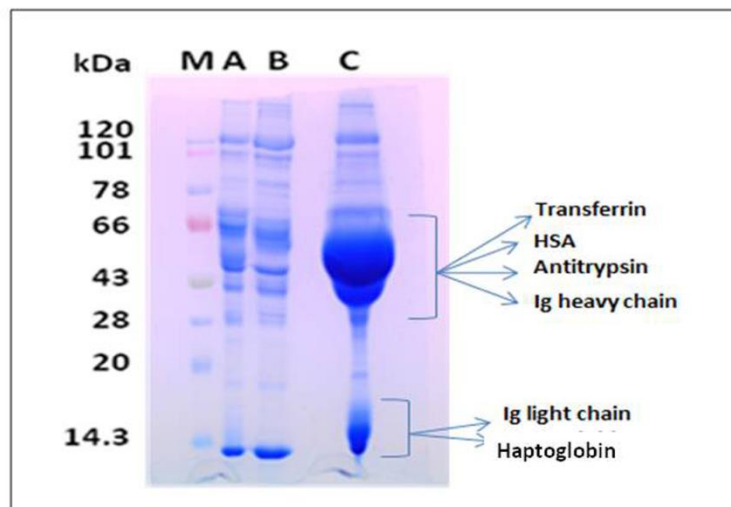

9

10

11 **Supplementary Figure 2: Snapshots of the blots for Apo E and beta actin from**  
 12 **healthy subjects, atopic asthmatics and COPD Patients.** (A) Image of blots stained  
 13 with Ponceau S. The image shows all the 3 blots for healthy subjects (1H, 2H, 3H, 4H,  
 14 5H), atopic asthmatics (1A, 2A, 3A, 4A 5A),and COPD Patients (1C, 2C, 3C, 4C, 5C).  
 15 M denotes the protein molecular weight ladder with labelled molecular weight. (B) **Blot**  
 16 **Image for Apo E in healthy subjects, atopic asthmatics and COPD Patients.** 1H, 2H,  
 17 3H, 4H and 5H denotes samples from healthy subjects; 1A, 2A, 3A, 4A and 5A denotes  
 18 samples from atopic asthmatics; and 1C, 2C, 3C, 4C and 5C denotes samples from COPD  
 19 patients. The band for Apo E has been labelled at a size corresponding to 34 kDa. (C)  
 20 **Blot Image for beta actin in healthy subjects, atopic asthmatics and COPD Patients.**  
 21 1H, 2H, 3H, 4H and 5H denotes samples from healthy subjects; 1A, 2A, 3A, 4A and 5A  
 22 denotes samples from atopic asthmatics; and 1C, 2C, 3C, 4C and 5C denotes samples  
 23 from COPD patients. The same blot used for Apo E was used to develop beta actin. The  
 24 band for beta actin has been labelled at a size corresponding to 42 kDa.

**Supplementary Figure 2**

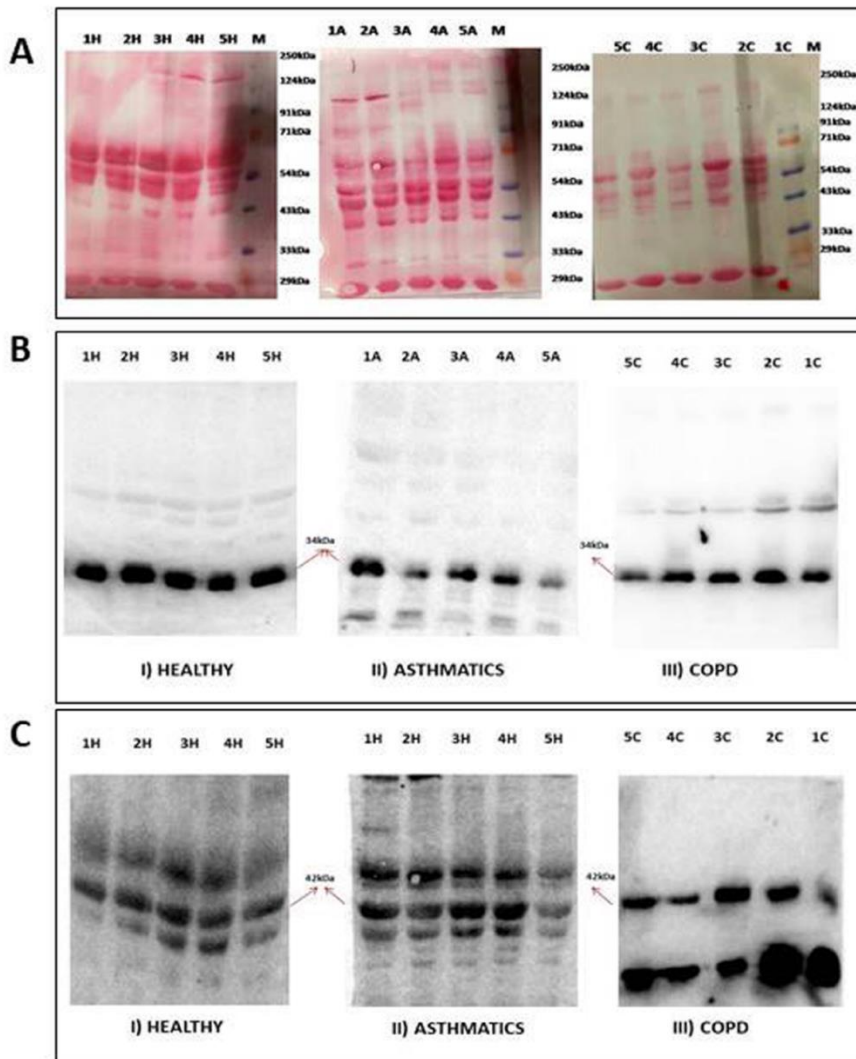

26 **Supplementary Table 1: Detailed information for healthy subjects, atopic**  
 27 **asthmatics and COPD patients.** The table enlists detailed information of Healthy  
 28 Volunteers, Atopic Asthma patients and COPD patients including age, sex, smoking  
 29 habits, IgE Count, % FEV1 and other health complications.

30  
 31 **Supplementary Table 1**

| Category                               | Sample ID | Age | Sex | Total IgE (IU/mL) | <i>Aspergillus fumigatus</i> Positive | <i>Dermatophagoides</i> spp. Positive | % Pred FEV1 | Smoking Habit                | Other Health Complications |
|----------------------------------------|-----------|-----|-----|-------------------|---------------------------------------|---------------------------------------|-------------|------------------------------|----------------------------|
| Healthy                                | 1H        | 27  | F   | 56                | ND                                    | ND                                    | 98          | NO                           | NO                         |
|                                        | 2H        | 30  | M   | 70                | ND                                    | ND                                    | 89          | NO                           | NO                         |
|                                        | 3H        | 42  | M   | 64                | ND                                    | ND                                    | 93          | NO                           | NO                         |
|                                        | 4H        | 44  | M   | 210               | ND                                    | ND                                    | 103         | NO                           | NO                         |
|                                        | 5H        | 26  | F   | 70.5              | ND                                    | ND                                    | 96          | NO                           | NO                         |
| Atopic Asthma                          | 1A        | 76  | M   | 435.7             | YES                                   | YES                                   | 52          | NO                           | NO                         |
|                                        | 2A        | 34  | M   | 386.7             | YES                                   | YES                                   | 57          | NO                           | NO                         |
|                                        | 3A        | 73  | F   | 1993.8            | YES                                   | YES                                   | 69          | NO                           | NO                         |
|                                        | 4A        | 63  | F   | 392               | YES                                   | YES                                   | 54          | NO                           | NO                         |
|                                        | 5A        | 66  | F   | 1785              | YES                                   | YES                                   | 67          | NO                           | NO                         |
| Chronic Obstructive Pulmonary Disorder | 1COPD     | 55  | M   | ND                | ND                                    | ND                                    | 40          | NO                           | NO                         |
|                                        | 2COPD     | 61  | M   | ND                | ND                                    | ND                                    | 37          | NO                           | NO                         |
|                                        | 3COPD     | 67  | M   | ND                | ND                                    | ND                                    | 21          | Presently NO, Previously YES | NO                         |
|                                        | 4COPD     | 70  | M   | ND                | ND                                    | ND                                    | 30          | Presently NO, Previously YES | NO                         |
|                                        | 5COPD     | 58  | M   | ND                | ND                                    | ND                                    | 45          | NO                           | NO                         |

32

33

34 **Supplementary Table 2: List of the different plasma proteins identified by LC-**  
 35 **MS/MS.** The attached MS Excel file enlists the total unique peptides identified and total  
 36 spectral count in healthy Controls (n=5) and atopic asthma patients (n=5) for the 167  
 37 different plasma proteins identified by mass spectrometry. The first sheet provides an  
 38 overview of the average of total unique peptide and average of spectral count for the  
 39 five healthy and five atopic asthma patient samples. The subsequent sheets (Nos. 2 to 5)  
 40 provide the total unique peptide and the total spectral count for each run of LC-MS/MS.

41 **Supplementary Table 2 is available from:**

42 [https://www.dovepress.com/get\\_supplementary\\_file.php?f=211569.xlsx](https://www.dovepress.com/get_supplementary_file.php?f=211569.xlsx)

43

44 **Supplementary Table 3: Details of the 14 Apolipoproteins identified by mass**  
45 **spectrometry. (A)** The table enlists the UniProt IDs, gi number, total unique peptides  
46 identified and total spectral count in healthy Controls (n=5) and atopic asthma patients  
47 (n=5) for the 14 different Apolipoproteins identified by LC-MS/MS. **(B)** The table enlists  
48 the Spectral Count for the 14 different Apolipoproteins identified in healthy subjects  
49 (n=5) and atopic asthma patients (n=5). **(C)** The table enlists the computed Normalized  
50 Spectral Abundance Factor (NSAF) values for the 14 different Apolipoproteins identified  
51 in healthy subjects (n=5) and atopic asthma patients (n=5). \* denotes that the p-value of  
52 Apo E was computed for healthy subjects (n=4) and atopic asthma patients (n=4) after  
53 excluding the NSAF obtained for sample 3H and 5A which appears to be outliers after  
54 normalization. Apo A1 and Apo B showed high abundance in terms of spectral count, but  
55 the NSAF value for Apo B was low owing to the large size of protein. NSAF for Apo A1  
56 was higher as the size of the protein was smaller compared to Apo B.  
57 **Supplementary Table 3A**

| Protein Name         | UniProt ID | Gene ID | Total Unique Peptide Mean |                         | Total Spectral Count Mean |                         |
|----------------------|------------|---------|---------------------------|-------------------------|---------------------------|-------------------------|
|                      |            |         | Healthy Subjects (n=5)    | Atopic Asthmatics (n=5) | Healthy Subjects (n=5)    | Atopic Asthmatics (n=5) |
| Apolipoprotein A-I   | P02647     | 335     | 43                        | 41                      | 275                       | 282                     |
| Apolipoprotein B     | P04114     | 338     | 125                       | 125                     | 169                       | 159                     |
| Apolipoprotein A-IV  | P06727     | 337     | 31                        | 24                      | 65                        | 39                      |
| Apolipoprotein E     | P02649     | 348     | 17                        | 15                      | 34                        | 26                      |
| Apolipoprotein D     | P05090     | 347     | 6                         | 5                       | 12                        | 7                       |
| Apolipoprotein A-II  | P02652     | 336     | 10                        | 12                      | 32                        | 41                      |
| Apolipoprotein C-I   | P02654     | 341     | 5                         | 4                       | 6                         | 8                       |
| Apolipoprotein C-II  | P02655     | 344     | 5                         | 5                       | 6                         | 7                       |
| Apolipoprotein C-III | P02656     | 345     | 2                         | 3                       | 3                         | 5                       |
| Apolipoprotein C-IV  | P55056     | 346     | 3                         | 4                       | 5                         | 6                       |
| Apolipoprotein L1    | O14791     | 8542    | 4                         | 4                       | 6                         | 5                       |
| Apolipoprotein M     | O95445     | 55937   | 2                         | 2                       | 4                         | 3                       |
| Apolipoprotein F     | Q13790     | 319     | 1                         | 2                       | 1                         | 2                       |
| Apolipoprotein a     | P08519     | 4018    | 2                         | 2                       | 2                         | 3                       |

58

59 **Supplementary Table 3B**

| Protein | Spectral Count for Healthy Subjects |     |     |     |     | Spectral Count for Atopic Asthmatics |     |     |     |     |
|---------|-------------------------------------|-----|-----|-----|-----|--------------------------------------|-----|-----|-----|-----|
|         | 1H                                  | 2H  | 3H  | 4H  | 5H  | 1A                                   | 2A  | 3A  | 4A  | 5A  |
| Apo A1  | 206                                 | 280 | 481 | 249 | 159 | 131                                  | 378 | 503 | 256 | 140 |
| Apo B   | 126                                 | 274 | 262 | 103 | 80  | 205                                  | 203 | 193 | 93  | 10  |
| Apo E   | 35                                  | 58  | 31  | 28  | 20  | 23                                   | 30  | 32  | 21  | 26  |
| Apo A4  | 68                                  | 70  | 105 | 54  | 27  | 25                                   | 53  | 65  | 36  | 15  |
| Apo D   | 10                                  | 14  | 7   | 14  | 13  | 5                                    | 15  | 2   | 6   | 7   |
| Apo A2  | 0                                   | 41  | 68  | 9   | 8   | 0                                    | 64  | 86  | 5   | 8   |
| Apo C1  | 0                                   | 8   | 12  | 2   | 2   | 0                                    | 10  | 19  | 1   | 1   |
| Apo C2  | 0                                   | 4   | 7   | 0   | 0   | 0                                    | 7   | 7   | 0   | 0   |
| Apo C3  | 0                                   | 7   | 1   | 0   | 1   | 0                                    | 9   | 1   | 0   | 0   |
| Apo C4  | 0                                   | 5   | 0   | 0   | 0   | 0                                    | 6   | 0   | 0   | 0   |
| Apo L1  | 5                                   | 12  | 9   | 2   | 2   | 3                                    | 16  | 2   | 3   | 1   |
| Apo M   | 0                                   | 1   | 2   | 7   | 4   | 0                                    | 2   | 2   | 1   | 7   |
| Apo F   | 0                                   | 2   | 0   | 1   | 1   | 0                                    | 3   | 1   | 0   | 0   |
| Apo a   | 0                                   | 3   | 1   | 2   | 2   | 0                                    | 5   | 3   | 1   | 1   |

60

61

62 **Supplementary Table 3C**

| <b>Protein</b> | <b>NSAF Values for Healthy Subjects</b> |           |           |           |           | <b>NSAF Values for Atopic Asthma Patients</b> |           |           |           |           | <b>P-value</b> |
|----------------|-----------------------------------------|-----------|-----------|-----------|-----------|-----------------------------------------------|-----------|-----------|-----------|-----------|----------------|
|                | <b>1H</b>                               | <b>2H</b> | <b>3H</b> | <b>4H</b> | <b>5H</b> | <b>1A</b>                                     | <b>2A</b> | <b>3A</b> | <b>4A</b> | <b>5A</b> |                |
| <b>Apo A1</b>  | 20.063                                  | 15.753    | 21.380    | 23.170    | 21.845    | 14.646                                        | 20.683    | 24.067    | 26.524    | 28.407    | 0.153          |
| <b>Apo B</b>   | 0.718                                   | 0.902     | 0.681     | 0.561     | 0.643     | 1.341                                         | 0.650     | 0.540     | 0.564     | 0.119     | 0.388          |
| <b>Apo E</b>   | 2.871                                   | 2.748     | 1.161     | 2.194     | 2.314     | 2.166                                         | 1.382     | 1.290     | 1.833     | 4.443     | 0.009*         |
| <b>Apo A4</b>  | 4.465                                   | 2.655     | 3.147     | 3.388     | 2.501     | 1.884                                         | 1.955     | 2.097     | 2.515     | 2.052     | 0.019          |
| <b>Apo D</b>   | 1.376                                   | 1.113     | 0.439     | 1.840     | 2.523     | 0.790                                         | 1.159     | 0.135     | 0.878     | 2.006     | 0.024          |
| <b>Apo A2</b>  | 0                                       | 6.159     | 8.070     | 2.236     | 2.935     | 0                                             | 9.350     | 10.986    | 1.383     | 4.334     | 0.084          |
| <b>Apo C1</b>  | 0                                       | 1.448     | 1.716     | 0.599     | 0.884     | 0                                             | 1.760     | 2.924     | 0.333     | 0.653     | 0.246          |
| <b>Apo C2</b>  | 0                                       | 0.595     | 0.823     | 0         | 0         | 0                                             | 1.012     | 0.885     | 0         | 0         | 0.151          |
| <b>Apo C3</b>  | 0                                       | 1.062     | 0.119     | 0         | 0.370     | 0                                             | 1.328     | 0.129     | 0         | 0         | 0.430          |
| <b>Apo C4</b>  | 0                                       | 0.591     | 0         | 0         | 0         | 0                                             | 0.690     | 0         | 0         | 0         | 0.187          |
| <b>Apo L1</b>  | 0.327                                   | 0.453     | 0.268     | 0.125     | 0.184     | 0.225                                         | 0.587     | 0.064     | 0.208     | 0.136     | 0.341          |
| <b>Apo M</b>   | 0                                       | 0.079     | 0.126     | 0.925     | 0.781     | 0                                             | 0.155     | 0.136     | 0.147     | 2.017     | 0.376          |
| <b>Apo F</b>   | 0                                       | 0.092     | 0         | 0.076     | 0.112     | 0                                             | 0.134     | 0.039     | 0         | 0         | 0.265          |
| <b>Apo a</b>   | 0                                       | 0.009     | 0.002     | 0.011     | 0.016     | 0                                             | 0.016     | 0.008     | 0.006     | 0.012     | 0.409          |

63

64

65 **Supplementary Table 4: Computed NSAF values of Apolipoprotein E in Healthy**  
66 **subjects and Atopic asthma patients.** The table enlists the Normal Spectral Abundance  
67 Factor (NSAF) for Apolipoprotein E across the different healthy and atopic asthma  
68 patient samples computed from the LC-MS/MS data and the average NSAF for healthy  
69 controls and asthmatics. † and \* denotes that the average NSAF of Apo E for healthy  
70 subjects and atopic asthma patients respectively have been computed excluding the NSAF  
71 obtained for sample 3H and 5A which appears to be outliers after normalization.

| Healthy Controls  | 1H       | 2H       | 3H       | 4H       | 5H       | Average   |
|-------------------|----------|----------|----------|----------|----------|-----------|
| NSAF for Apo E    | 2.871153 | 2.748472 | 1.160608 | 2.194512 | 2.314409 | 2.257831† |
| Atopic Asthmatics | 1A       | 2A       | 3A       | 4A       | 5A       | Average   |
| NSAF for Apo E    | 2.165921 | 1.382578 | 1.289601 | 1.832651 | 4.443451 | 1.667688* |

72  
73

74 **Supplementary Table 5: Details of densitometric analysis from Western Blot of**  
75 **Apolipoprotein E.** The table enlists the densities of Apolipoprotein E (Apo E) bands  
76 obtained from western blot across healthy controls, atopic asthma and COPD patient  
77 samples and the standard errors across the samples. Apo E expression level has been  
78 analyzed with respect to Beta Actin (internal control). 1H, 2H, 3H, 4H, 5H denotes the  
79 healthy samples; 1A, 2A, 3A, 4A and 5A denotes the atopic asthma patient samples and  
80 1COPD, 2COPD, 3COPD, 4COPD, 5COPD denotes the COPD patient samples.

| Category      | Samples | Apo E expression level with respect to Beta Actin | Average Apo E expression level with respect to Beta Actin | Standard Error |
|---------------|---------|---------------------------------------------------|-----------------------------------------------------------|----------------|
| Healthy       | 1H      | 1.712                                             | 1.626                                                     | 0.176          |
|               | 2H      | 1.369                                             |                                                           |                |
|               | 3H      | 1.301                                             |                                                           |                |
|               | 4H      | 1.473                                             |                                                           |                |
|               | 5H      | 2.274                                             |                                                           |                |
| Atopic Asthma | 1A      | 0.847                                             | 0.801                                                     | 0.081          |
|               | 2A      | 0.949                                             |                                                           |                |
|               | 3A      | 0.862                                             |                                                           |                |
|               | 4A      | 0.865                                             |                                                           |                |
|               | 5A      | 0.483                                             |                                                           |                |
| COPD          | 1COPD   | 1.708                                             | 1.258                                                     | 0.139          |
|               | 2COPD   | 1.208                                             |                                                           |                |
|               | 3COPD   | 1.354                                             |                                                           |                |
|               | 4COPD   | 1.165                                             |                                                           |                |
|               | 5COPD   | 0.854                                             |                                                           |                |

81  
82

83 **Supplementary Table 6: List of pro-inflammatory cytokines analyzed by ELISA**  
 84 **and their outcomes.** Only IL-33 was within the detection limit while the other  
 85 interleukins tested namely, IL-4, IL-5 and IL-13 were not within the detection limit.

| Cytokines Studied | Outcome             |
|-------------------|---------------------|
| IL-4              | Not Detectable      |
| IL-5              | Not Detectable      |
| IL-13             | Not Detectable      |
| IL-33             | Detected (in pg/ml) |

86

87 **Supplementary Table 7: (A) OD values at 450 nm and corresponding concentration**  
 88 **of IL-33 (pg/ml) in healthy volunteers and atopic asthmatics.** IL-33 level was  
 89 measured thrice using Quantikine ELISA kit for Human IL-33 (R&D systems; Lot No.:  
 90 P118763). The plasma concentration of IL-33 was computed from the OD values at 450  
 91 nm using the standard curve equation:  $y = 0.004x$ . 1H, 2H, 3H, 4H, 5H denotes the healthy  
 92 samples; 1A, 2A, 3A, 4A and 5A denotes the atopic asthma patient samples.

93 **(B) OD values at 450 nm and corresponding concentration of IL-33 (pg/ml) in COPD**  
 94 **patients.** IL-33 level was measured thrice using Quantikine ELISA kit for Human IL-33  
 95 (R&D systems; Lot No.: P177042). The plasma concentration of IL-33 was computed  
 96 from the OD values at 450 nm using the standard curve equations  $y = 0.0118x + 0.005$ .  
 97 1COPD, 2COPD, 3COPD, 4COPD, 5COPD denotes the COPD patient samples. The  
 98 tables show the individual and mean IL-33 concentration (in pg/ml) and the standard error  
 99 computed across the healthy subjects and patients.

100

101

**Supplementary Table 7A**

| Category          | Samples | Average OD values at 450 nm | Concentration (pg/ml) | Average Concentration (pg/ml) | Standard Error |
|-------------------|---------|-----------------------------|-----------------------|-------------------------------|----------------|
| Healthy Subjects  | 1H      | 0.011                       | 2.75                  | 2.35 pg/ml                    | 0.308          |
|                   | 2H      | 0.006                       | 1.417                 |                               |                |
|                   | 3H      | 0.008                       | 1.917                 |                               |                |
|                   | 4H      | 0.010                       | 2.5                   |                               |                |
|                   | 5H      | 0.013                       | 3.167                 |                               |                |
| Atopic Asthmatics | 1A      | 0.038                       | 9.417                 | 9.033 pg/ml                   | 0.585          |
|                   | 2A      | 0.044                       | 10.917                |                               |                |
|                   | 3A      | 0.031                       | 7.667                 |                               |                |
|                   | 4A      | 0.032                       | 7.917                 |                               |                |
|                   | 5A      | 0.037                       | 9.25                  |                               |                |

102

103

**Supplementary Table 7B**

| Category      | Samples | Average OD values at 450 nm | Concentration (pg/ml) | Average Concentration (pg/ml) | Standard Error |
|---------------|---------|-----------------------------|-----------------------|-------------------------------|----------------|
| COPD Patients | 1COPD   | 0.0683                      | 5.757                 | 5.92 pg/ml                    | 0.089          |
|               | 2COPD   | 0.0677                      | 5.697                 |                               |                |
|               | 3COPD   | 0.0727                      | 6.152                 |                               |                |
|               | 4COPD   | 0.072                       | 6.091                 |                               |                |
|               | 5COPD   | 0.0703                      | 5.939                 |                               |                |

104
